# Supplementary material for: Hyaluronan/Ru(ii)-cyclodextrin supramolecular assemblies for colorimetric sensor of hyaluronidase activity
Source: Royal Society of Chemistry journal article supplement (doi:10.1039/c5ra19122j), 2015-01-01
Supplement: c5ra19122j1.pdf [file c5ra19122j1.pdf]

# Electronic Supporting Information

Ping Hu<sup>a</sup>, Yong Chen<sup>a,b</sup>, Yu Liu<sup>a,b\*</sup>

<sup>a</sup>Department of Chemistry, State Key Laboratory of Elemento-Organic Chemistry,

<sup>b</sup>Collaborative Innovation Center of Chemical Science and Engineering, Nankai University,

Tianjin 300071, P. R. China.

Email: [yuliu@nankai.edu.cn](mailto:yuliu@nankai.edu.cn)

## INDEX

|                                                                                                                                                 |     |
|-------------------------------------------------------------------------------------------------------------------------------------------------|-----|
| <b>Experimental Section</b> .....                                                                                                               | E2  |
| Materials.....                                                                                                                                  | E2  |
| Instruments.....                                                                                                                                | E2  |
| Synthesis of <b>L</b> .....                                                                                                                     | E2  |
| Synthesis of <b>RuL<sub>3</sub></b> .....                                                                                                       | E3  |
| The determination about the conformation of assemblies.....                                                                                     | E4  |
| TEM Measurement.....                                                                                                                            | E4  |
| DLS Measurement.....                                                                                                                            | E4  |
| Fluorescence Spectroscopy.....                                                                                                                  | E5  |
| Fluorescence lifetime.....                                                                                                                      | E5  |
| HAase response of assemblies.....                                                                                                               | E5  |
| HAase induced color changes with laser.....                                                                                                     | E6  |
| <b>Figures</b> .....                                                                                                                            | E7  |
| Figure S1 <sup>1</sup> H-NMR (400 MHz) spectrum of <b>L</b> in D <sub>2</sub> O.....                                                            | E7  |
| Figure S2 <sup>13</sup> C-NMR (101 MHz) spectrum of <b>L</b> in D <sub>2</sub> O.....                                                           | E7  |
| Figure S3 <sup>1</sup> H-NMR (400 MHz) spectrum of <b>RuL<sub>3</sub></b> in D <sub>2</sub> O.....                                              | E8  |
| Figure S4 ESI-MS spectra of <b>L</b> .....                                                                                                      | E9  |
| Figure S5 ESI-MS spectra of <b>RuL<sub>3</sub></b> .....                                                                                        | E11 |
| Figure S6 UV-Vis spectrum of <b>RuL<sub>3</sub></b> .....                                                                                       | E11 |
| Figure S7 Fluorescence life time spectrum of <b>RuL<sub>3</sub></b> in water.....                                                               | E11 |
| Figure S8 Fluorescence life time experiment report of <b>RuL<sub>3</sub></b> in water.....                                                      | E12 |
| Figure S9 Time dependence transmittance of <b>H<sub>0.5</sub>R<sub>40</sub></b> solution in the present of HAase.....                           | E13 |
| Figure S10 Fluorescence spectra of <b>H<sub>0.5</sub>R<sub>40</sub></b> and <b>H<sub>0.5</sub>R<sub>40</sub></b> with HAase (7 h) in water..... | E13 |
| Reference .....                                                                                                                                 | E14 |

## Experimental Section

**Materials.** All solvents and reagents were commercially available and used without further purification unless otherwise noted. Anhydrous N,N-dimethylformamide (DMF) was dried and distilled over CaH<sub>2</sub> under reduced pressure. All aqueous solutions were prepared with distilled water.  $\beta$ -CD of reagent grade (Shanghai Reagent Factory) was recrystallized twice from water and dried in vacuum at 95°C for 24 h prior to use. Ruthenium(III) chloride hydrate (RuCl<sub>3</sub>·xH<sub>2</sub>O), imidazole, 1,10-phenanthroline, and bromoacetyl bromide were purchased from Tianjin FuChen Chemical Reagents Factory. Hyaluronan (MW = 100 kDa) was purchased from Shandong Freda Biopharm Co., Ltd. Hyaluronidase (HAase) from bovine testes (Type I-S, lyophilized powder, 400-1000 units/mg solid) was purchased from Sigma-Aldrich. The synthesis of 2-bromo-N-(1,10-phenanthroline-5-yl)acetamide hydrobromide was following the method reported<sup>[S1]</sup> and the synthesis of mono-6-Imidazolyl- $\beta$ -CD was following the method reported<sup>[S2]</sup>. The prepare of Ru(DMSO)<sub>4</sub>Cl<sub>2</sub> was following the method reported<sup>[S3]</sup>.

**Instruments.** NMR spectra were recorded on a Bruker AV 400 spectrometer, and two-dimensional NMR spectra were recorded in D<sub>2</sub>O on a Varian Mercury VX-300 spectrometer. Mass spectra were recorded on a Varian 7.0T FTICR mass spectrometer (MALDI). Elemental analysis was performed by using a Vario EL Cube elemental analyzer (Elementar Ltd. Corp., Germany). UV/Vis spectra were recorded in a quartz cell (light path 10 mm) on a Shimadzu UV-3600 spectrophotometer equipped with a PTC-384WI temperature controller. Fluorescence spectra were recorded on Cary Eclipse Fluorescence Spectrophotometer. Fluorescence lifetime was detected on Fluorescent Spectrometer Mode: FLS920.

## Synthesis of L

2-bromo-N-(1,10-phenanthroline-5-yl)acetamide hydrobromide (0.418 mmol, 200 mg) was separated in DMF 2 ml then mixed with N,N-diisopropylethylamine (0.527 mmol, 68 mg) to form a red clear solution. This solution was added to a solution of mono-imidazole-6- $\beta$ -CD (0.348 mmol, 413 mg) in DMF (5 mL). The mixture was stirred at room temperature for 48 h, and then was poured into excess ethanol (300 mL) to give an orange suspension. The

precipitate was collected with filtration (0.22  $\mu\text{m}$  water phase membrane) then dissolved in the minimum amount of cold water, and then poured into acetone (400 mL). The product (orange powder) was collected by filtration with a yield of 270 mg (52 %). ESI-MS,  $m/z$  (calculated) = 1420.48 (**L-Br**),  $m/z$  (found) = 1420.47 (**L-Br**); Elemental analysis calculated for  $\text{C}_{59}\text{H}_{90}\text{BrN}_5\text{O}_{39}$  (**L** $\cdot$ 4 $\text{H}_2\text{O}$ ) (%): C 45.04, H 5.77, N 4.45. Found (%): C 45.19, H 6.03, N 4.49;  $^1\text{H}$  NMR ( $\text{D}_2\text{O}$ , 400 MHz)  $\delta$  9.07-9.01 (d, 3H), 8.51-8.41 (m, 2H), 7.96 (s, 1H), 7.85-7.77 (m, 2H), 7.70-7.68 (d, 2H), 5.53 (s, 2H), 5.07-4.94 (m, 7H), 4.56-4.50 (m, 1H), 4.22-4.18 (m, 1H), 4.05-3.28 (m, 40H).  $^{13}\text{C}$  NMR (100 MHz,  $\text{D}_2\text{O}$ )  $\delta$  166.49, 149.82, 149.24, 143.62, 142.10, 138.24, 137.29, 132.04, 129.55, 127.53, 124.42, 123.86, 123.53, 121.92, 101.82, 82.57, 81.58, 81.09, 73.05, 72.89, 72.49, 72.35, 72.02, 71.78, 71.51, 69.55, 60.73, 60.22, 59.94, 51.28, 50.22

### Synthesis of **RuL<sub>3</sub>**

**L** (330 mg, 0.22 mmol) and  $\text{Ru}(\text{DMSO})_4\text{Cl}_2$  (30 mg, 0.062 mmol) was dissolved in 10 ml water and 2 ml EtOH. This mixture was stirred and heated to 100°C under Ar atmosphere and aluminium foil was used to prevent light. After 48h, the colour of mixture turn to be drak red from yellow. The mixture was cooled to room tempeerture then purged to excess EtOH (about 300 ml) then pink suspension was found. The precipitate was collected with filtration (0.22  $\mu\text{m}$  organic phase memberane). The crude product was dissolved in the minimum amount of cold water, and then poured into EtOH (400 mL). This operation was repeated for 2 times. The product (orange-red powder) was collected by filtration with a yield of 140 mg (48 %). ESI-MS,  $m/z$  (calculated) = 1454.44 (**RuL<sub>3</sub>-2H-2Cl-3Br**),  $m/z$  (found) = 1454.44 (**RuL<sub>3</sub>-2H-2Cl-3Br**);  $m/z$  (calculated) = 2181.16 (**RuL<sub>3</sub>-3H-2Cl-3Br**),  $m/z$  (found) = 2181.14 (**RuL<sub>3</sub>-3H-2Cl-3Br**); Elemental analysis calculated for  $\text{C}_{177}\text{H}_{326}\text{Br}_3\text{Cl}_2\text{N}_{15}\text{O}_{145}\text{Ru}$  (**RuL<sub>3</sub>** $\cdot$ 40 $\text{H}_2\text{O}$ ) (%): C 39.40, H 6.09, N 3.89. Found (%): C 39.41, H 6.29, N 3.94;  $^1\text{H}$  NMR ( $\text{D}_2\text{O}$ , 400 MHz)  $\delta$  9.07 (s, 3H), 8.61-8.54 (m, 6H), 8.31 (s, 3H), 8.15-8.08 (m, 6H), 7.68-7.59 (m, 9H), 5.56 (s, 6H), 5.05-4.99 (m, 21H), 4.58-4.55 (m, 3H), 4.23 (m, 3H), 3.99-3.33 (m, 120H)

### **The determination about the formation of assemblies.**

The method to investigate the best concentration ratio to form assemblies was followed the previous reports<sup>[S4]</sup>. The store solutions of **RuL** and HA (MW = 100 kDa) were prepared. ( $[\mathbf{RuL}_3] = 20 \text{ mM}$  and  $[\text{HA}] = 0.2 \text{ mM}$ ). Such solution was diluted to the needed concentration with redistilled water. In a general method, a series of samples with sequential concentrations were prepared, filled to standard quartz cell and stabilized for about 10 minutes before the transmittance spectra (200-800 nm) were recorded. The transmittance (%) of these samples at  $\lambda = 650 \text{ nm}$  were used to calculate the CAC. If no mentioned, the temperature of experiments was 25 °C. 1cm x 1cm quartz cell was used. The CAC of hyaluronan was determined at  $[\text{HA}] = 0.5 \text{ }\mu\text{M}$  and  $[\mathbf{RuL}_3] = 1\text{-}40 \text{ }\mu\text{M}$ . In the next stage, the concentration of **RuL**<sub>3</sub> was fixed at 40  $\mu\text{M}$  and  $[\text{HA}]$  was changed from 0.1-1.5  $\mu\text{M}$ . The lowest of  $T_{650}\%$  was found at  $[\mathbf{RuL}_3] = 40 \text{ }\mu\text{M}$  and  $[\text{HA}] = 0.5 \text{ }\mu\text{M}$ .

### **TEM Measurement.**

High-resolution TEM images were acquired using a Tecnai 20 high-resolution transmission electron microscope operating at an accelerating voltage of 200 keV. Samples ( $[\mathbf{RuL}_3] = 40 \text{ }\mu\text{M}$  and  $[\text{HA}] = 0.5 \text{ }\mu\text{M}$ ) were prepared by dropping the solution on carbon membrane. The samples were then air-dried and the samples were examined.

### **DLS Measurement.**

DLS measurements and zeta potential measurements were examined on a laser light scattering spectrometer (Nanobrook 173plus, Brookhaven Co. USA) equipped with a digital correlator at 636 nm at a scattering angle of 90°. Sample ( $[\mathbf{RuL}_3] = 40 \text{ }\mu\text{M}$  and  $[\text{HA}] = 0.5 \text{ }\mu\text{M}$ ) was prepared in redistilled water then added to glass cell for DLS. The temperature was 25°C in the diameter detection and 37°C in the assembly stability experiment.

### **Fluorescence Spectroscopy**

The condition of experiment about excitation and emission fluorescence spectra which were shown in Figure 1 in main article are those: standard 3 ml (10mm x 10mm) quartz cell, Ex slit

= 5 nm, Em slit = 10 nm. In Figure S10 of ESI, micro 1 ml (3mm x 10mm) quartz cell was used. Ex wavelength = 532 nm, Ex slit = 10 nm, Em slit = 10 nm. The temperatures in all of fluorescence investigation are 25 °C (298 K) if no mention.

### **Fluorescence lifetime**

The fluorescence lifetime was detected on Fluorescent Spectrometer Mode: FLS920 (Edinburgh Instruments) with microseconds lamp. (Ex = 450 nm and Em = 600 nm). The solution ( $[\text{RuL}_3] = 2 \mu\text{M}$  in water) was filled to micro 1 mL (3 mm x 10 mm) quartz cell. The 10 mm face was irradiated with excited light beam.

### **HAase response of assemblies**

In each experiment of assembly, the concentration of store solution HAase was 4000 U ml<sup>-1</sup>. Such concentration was calculated from “400 U / mg solid” according to the introduction of commercial HAase powder.

#### **(1) Time dependence of HAase induce degradation of $\text{H}_{0.5}\text{R}_{40}$**

The samples contain  $[\text{RuL}_3] = 40 \mu\text{M}$ ,  $[\text{HA}] = 0.5 \mu\text{M}$ . The concentration of HAase was 10 U ml<sup>-1</sup>. Such sample was filled to standard quartz cell (1cm x 1cm) and the temperature was maintained at 37°C by the temperature controller on uv-vis spectroscopy. The transmittances from 200-800 nm were collected per 1800 s and the total experiment time was 5 hours. As a control experiment, the stability of  $\text{H}_{0.5}\text{R}_{40}$  assembly was also detected follow this operation.

#### **(2) HAase concentration dependence of HAase induce degradation of $\text{H}_{0.5}\text{R}_{40}$**

HAase concentration dependence of HAase induce degradation was detected following above method. The concentrations of HAase were fixed at 1 U ml<sup>-1</sup> and 10 U ml<sup>-1</sup>. The transmittances from 200-800 nm were collected per 1800 s and the total experiment time was 5 hours. As a control, the sample in the absence of HAase was also detected with same condition and operation.

## HAase induced color changes with laser

To investigate the colorimetric changes in the disassembly of  $\mathbf{H}_{0.5}\mathbf{Ru}_{40}$  induced by HAase, handle pen-like laser equipments were used in HAase response experiment. Red laser ( $\lambda = 650$  nm, 50 mW), Green laser ( $\lambda = 532$  nm, 200 mW) and Blue-Violet laser ( $\lambda = 405$  nm, 50 mW). The temperature was maintained at 37°C with water bath during experiment. Green laser ( $\lambda = 532$  nm, 200 mW) irradiated from one side of bottle and the phenomena were captured with camera. The angle between the laser and the camera was near 90 degree. The bottle, camera and laser were on same plane in our experiment.

### (1) Time dependence of HAase induce degradation of $\mathbf{H}_{0.5}\mathbf{Ru}_{40}$

The samples (3 ml) contain  $[\mathbf{RuL}_3] = 40$   $\mu\text{M}$ ,  $[\text{HA}] = 0.5$   $\mu\text{M}$ ,  $[\text{HAase}] = 10$  U ml<sup>-1</sup> was prepared, sealed in glass bottle then stored in 37°C water bath. After 0h, 2h and 7h later, the sample had been cooled to room temperature and the images were captured.

### (2) HAase concentration dependence of HAase induce degradation of $\mathbf{H}_{0.5}\mathbf{Ru}_{40}$

The samples (3 ml) contain  $[\mathbf{RuL}_3] = 40$   $\mu\text{M}$ ,  $[\text{HA}] = 0.5$   $\mu\text{M}$ ,  $[\text{HAase}] = 0.1, 1$  and 10 U ml<sup>-1</sup> were prepared, sealed in glass bottle then stored in 37°C water bath. After the samples had cooled to room temperature, the images were recorded at 7h.

---

## Figures

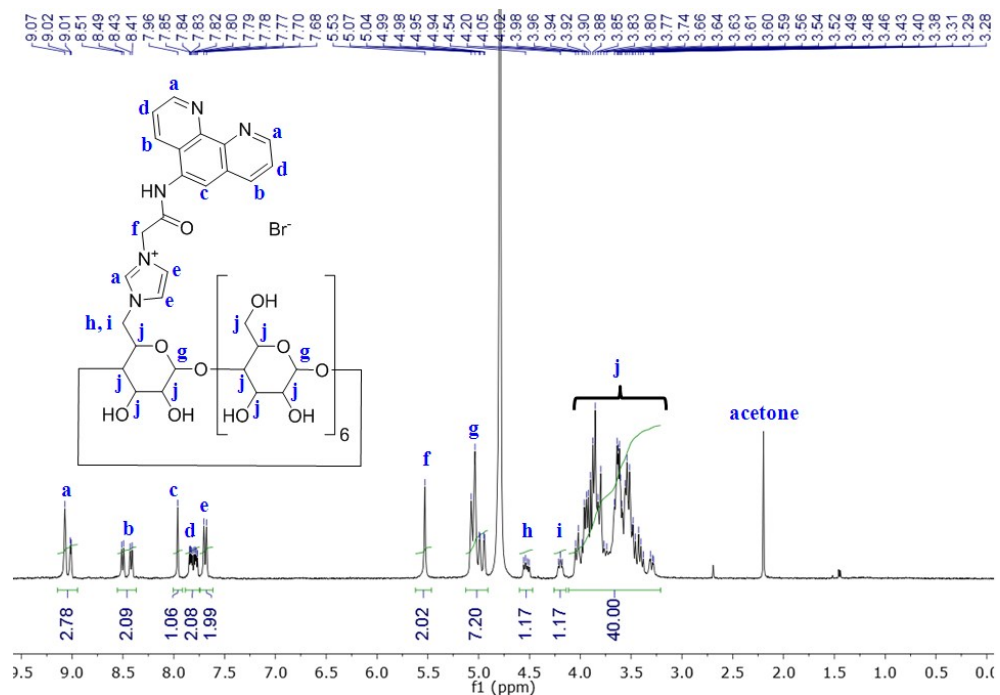

Figure S1  $^1\text{H}$  NMR (400 MHz) spectrum of **L** in  $\text{D}_2\text{O}$ .

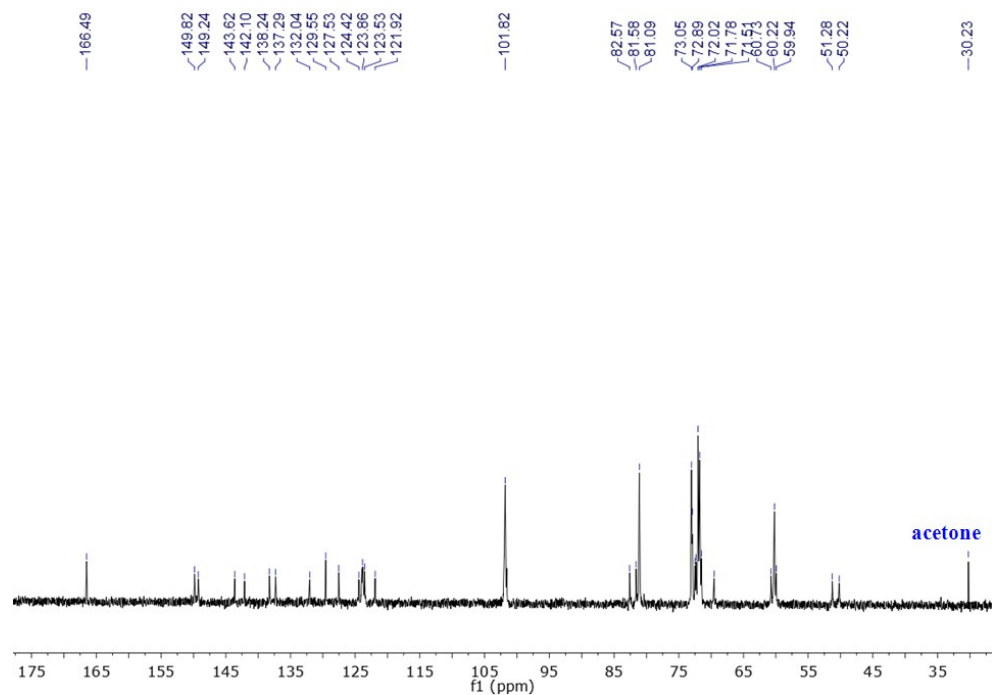

Figure S2  $^{13}\text{C}$  NMR (100 MHz) spectrum of **L** in  $\text{D}_2\text{O}$ .

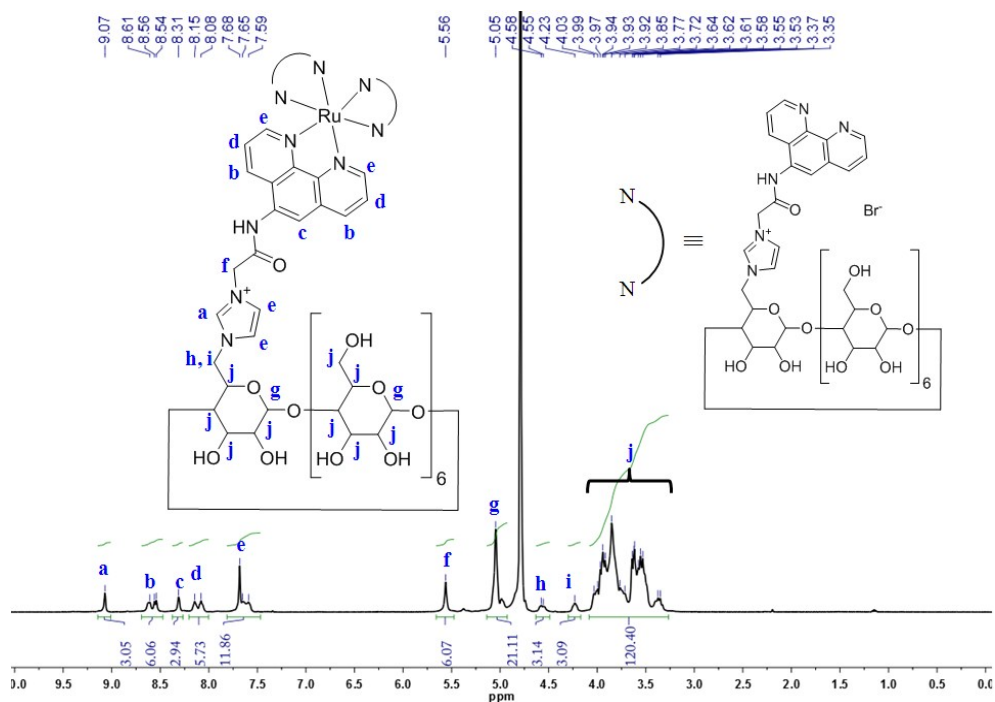

Figure S3 <sup>1</sup>H-NMR (400 MHz) spectrum of **RuL<sub>3</sub>** in D<sub>2</sub>O.

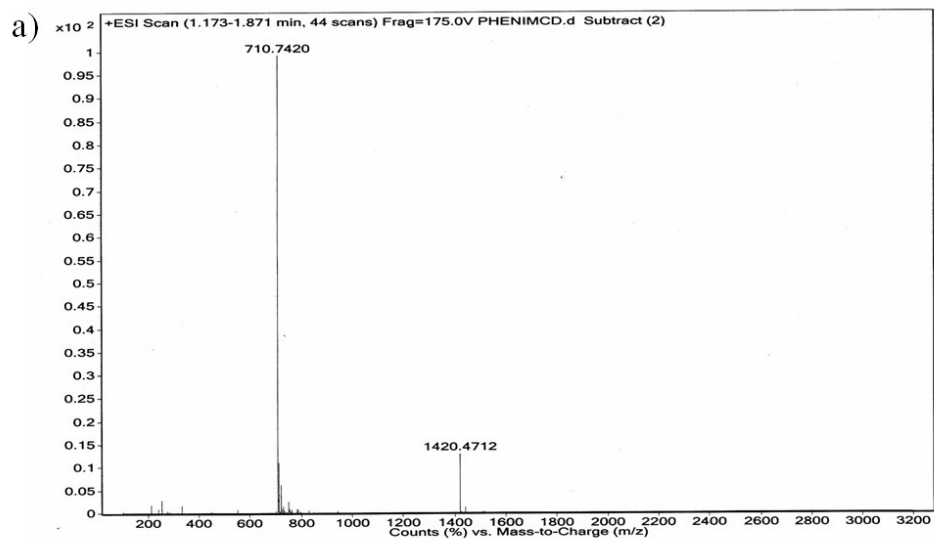



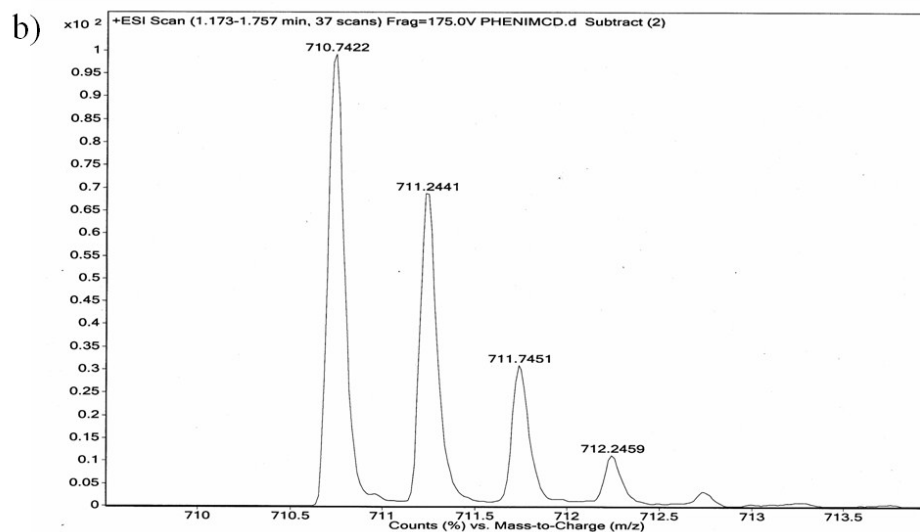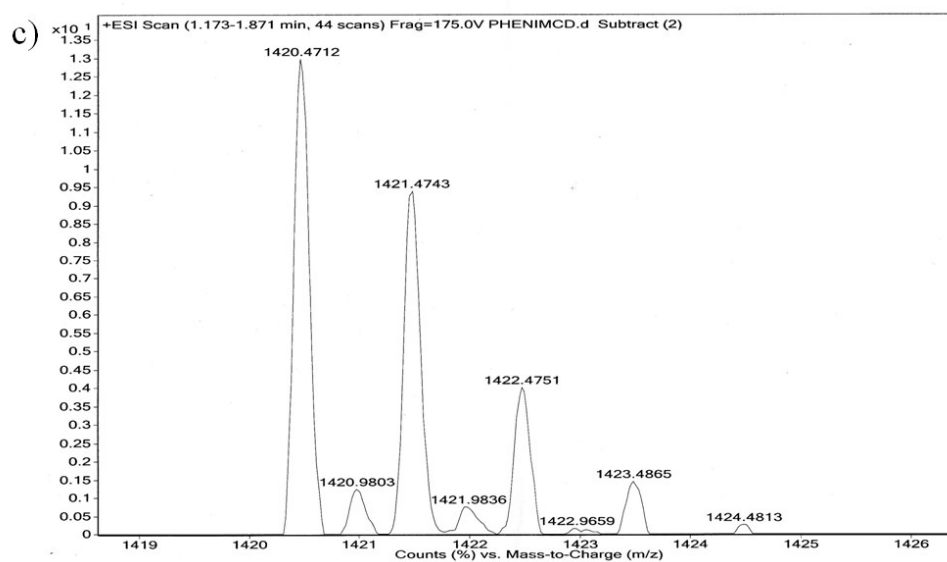

Figure S4 (a) ESI-MS spectrum of **L**; (b)  $m/z$  (calculated) = 710.74 (**L-Br+H**),  $m/z$  (found) = 710.74 (**L-Br+H**); (c)  $m/z$  (calculated) = 1420.48 (**L-Br**),  $m/z$  (found) = 1420.47 (**L-Br**).

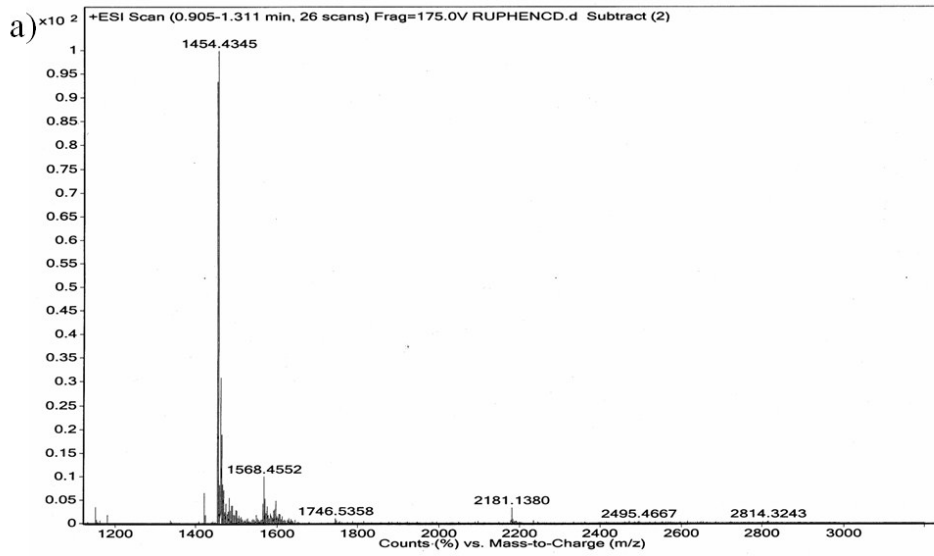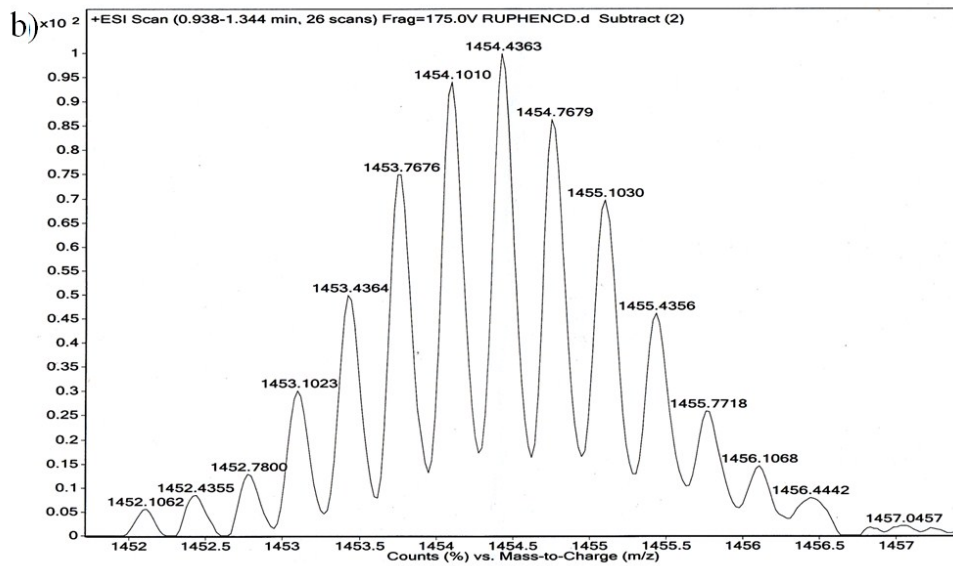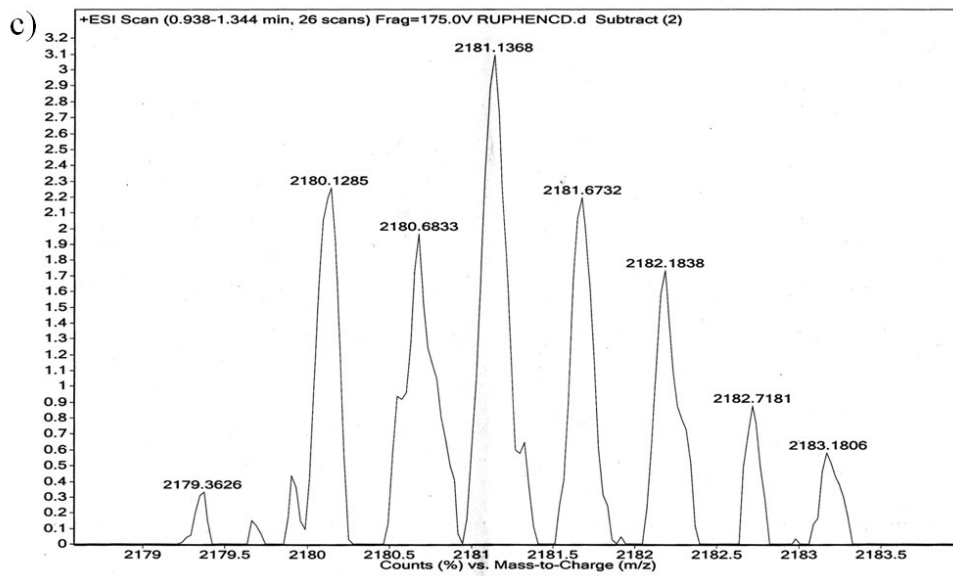

Figure S5 (a) ESI-MS spectrum of  $\text{RuL}_3$ ; (b)  $m/z$  (calculated) = 1454.44 ( $\text{RuL}_3\text{-2H-2Cl-3Br}$ ),  $m/z$  (found) = 1454.44 ( $\text{RuL}_3\text{-2H-2Cl-3Br}$ ); (c)  $m/z$  (calculated) = 2181.16 ( $\text{RuL}_3\text{-3H-2Cl-3Br}$ ),  $m/z$  (found) = 2181.14 ( $\text{RuL}_3\text{-3H-2Cl-3Br}$ ).

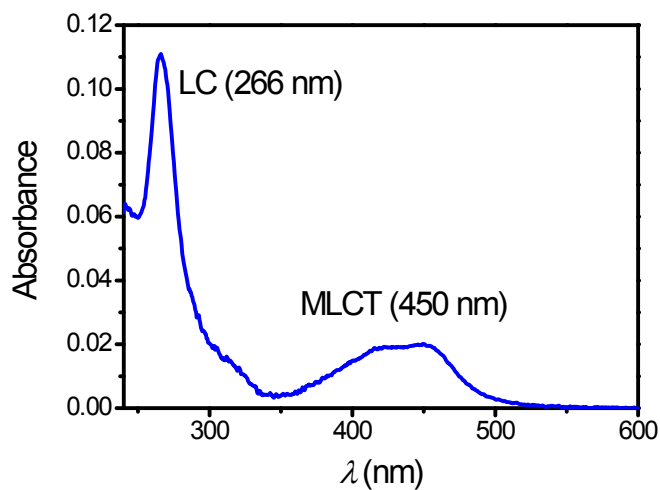

Figure S6 UV-Vis spectrum of  $\text{RuL}_3$  (2  $\mu\text{M}$  in water, 10 mm standard cell, 10mm x 10 mm)

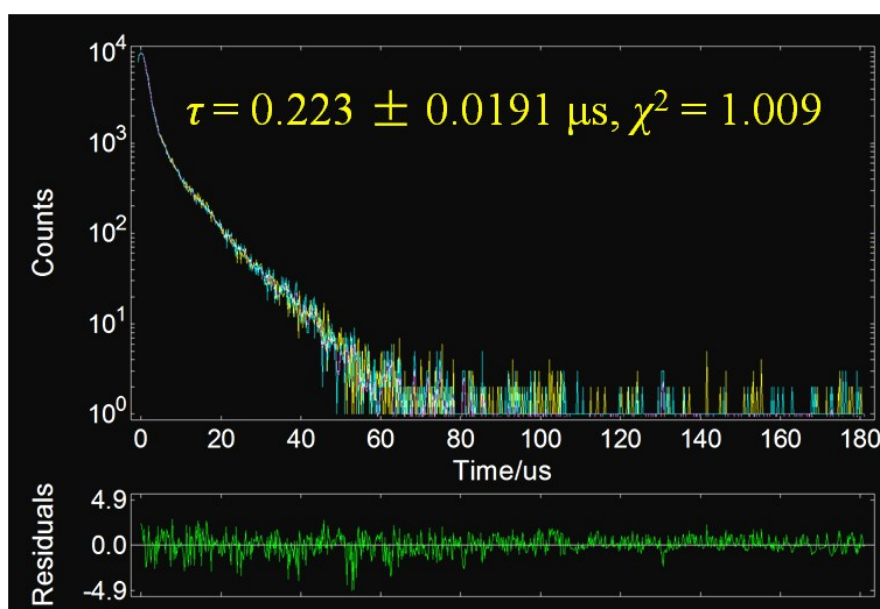

Figure S7 Fluorescence life time spectrum of  $\text{RuL}_3$  in water in 1 ml micro cell. Condition:  $[\text{RuL}_3] = 2 \mu\text{M}$ , Temp. = 25  $^\circ\text{C}$  (Ex = 450 nm, Em = 600 nm)

## Fit Results

Fit :  $A+B1\exp(-t/\tau_4)$

Instrument Response : **IR1**  
 Range (ch) : 0 to 999  
 Peak Count : 9881 in channel 94  
 Total Count : 214375  
 Background : 0.122  
  
 Decay Scan : **Decay3**  
 File location : File has not been saved.  
 Range (ch) : 0 to 999  
 Peak Count : 9868 in channel 94  
 Total Count : 214375  
  
 Time Calibration : 200.000  $\mu$ s/ch  
 Total Experiment Time : 468.00 s  
  
 Fit Range (ch) : 94 to 999

| <u>Parameter</u> | <u>Value</u> | <u>Std. Dev.</u> | <u>Rel %</u> |
|------------------|--------------|------------------|--------------|
| $\tau_4$         | 2.231E-007 s | 1.9074E-008 s    |              |
| Shift            | 1.351E-004 s | 2.104E-005 s     |              |
| B1               | 0.839        | 0.0634           | 100.00       |
| A                | -0.200       |                  |              |
| $\chi^2$         | 1.009        |                  |              |

Figure S8 Fluorescence life time experiment report of **RuL<sub>3</sub>** in water in 1 ml micro cell.  
 Condition: [**RuL<sub>3</sub>**] = 2  $\mu$ M, Temp. = 25  $^{\circ}$ C. (Ex = 450 nm, Em = 600 nm).

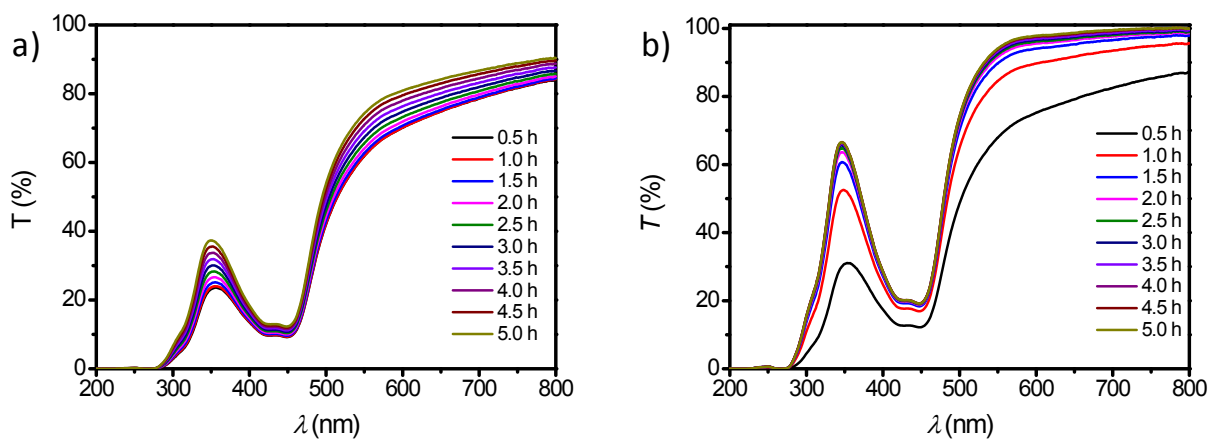

Figure S9 Time dependence transmittance of  $\mathbf{H}_{0.5}\mathbf{R}_{40}$  solution in the present of HAase. (a)  $[\text{HAase}] = 1 \text{ U ml}^{-1}$ ; (b)  $[\text{HAase}] = 10 \text{ U ml}^{-1}$ . Temp. =  $37 \text{ }^\circ\text{C}$ .  $1 \text{ cm} \times 1 \text{ cm}$  quartz cell was used.

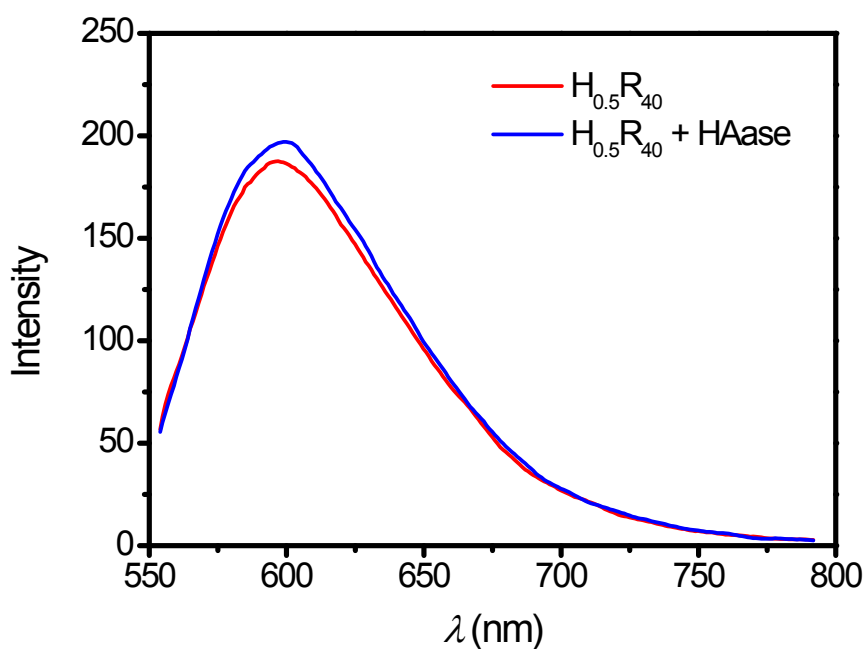

Figure S10 Fluorescence spectra of  $\mathbf{H}_{0.5}\mathbf{R}_{40}$  and  $\mathbf{H}_{0.5}\mathbf{R}_{40}$  with HAase (7 h) in water.  $1 \text{ ml}$  micro cell ( $3 \text{ mm} \times 10 \text{ mm}$ ) was used. (Ex =  $532 \text{ nm}$ , Ex slit =  $10 \text{ nm}$ , Em slit =  $10 \text{ nm}$ ). Temp. =  $25 \text{ }^\circ\text{C}$

## Reference

- S1. J. Bos, F. Fusetti, A. J. M. Driessen and G. Roelfes, *Angew. Chem. Int. Ed.*, 2012, **51**, 7472-7475.
- S2. R. Breslow, P. Bovy and C. Lipse Hersh, *J. Am. Chem. Soc.*, 1980, **102**, 2115-2117.
- S3. C. E. McCusker and J. K. McCusker, *Inorg. Chem.*, 2011, **50**, 1656-1669.
- S4. D.-S. Guo, K. Wang, Y.-X. Wang and Y. Liu, *J. Am. Chem. Soc.*, 2012, **134**, 10244-10250.
